# Supplementary material
Source: PubMed Central journal article supplement (PMC3906805)

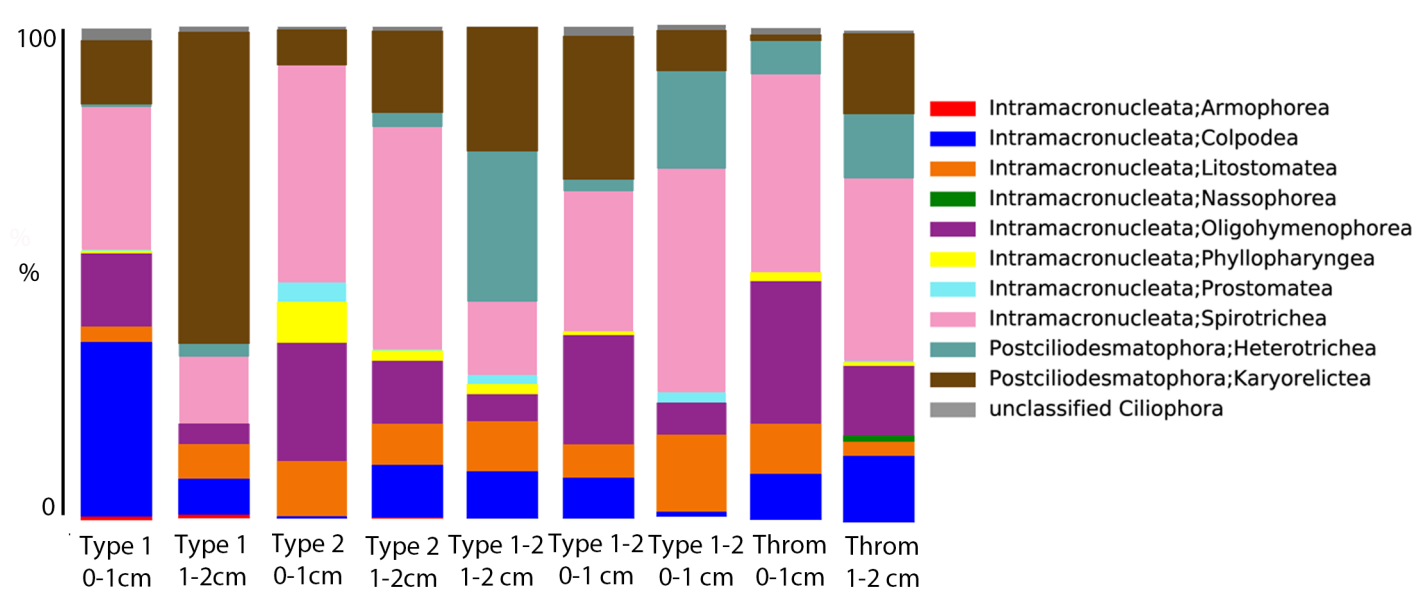

Supplement: ismej2013130x1.pdf [file ismej2013130x1.pdf]

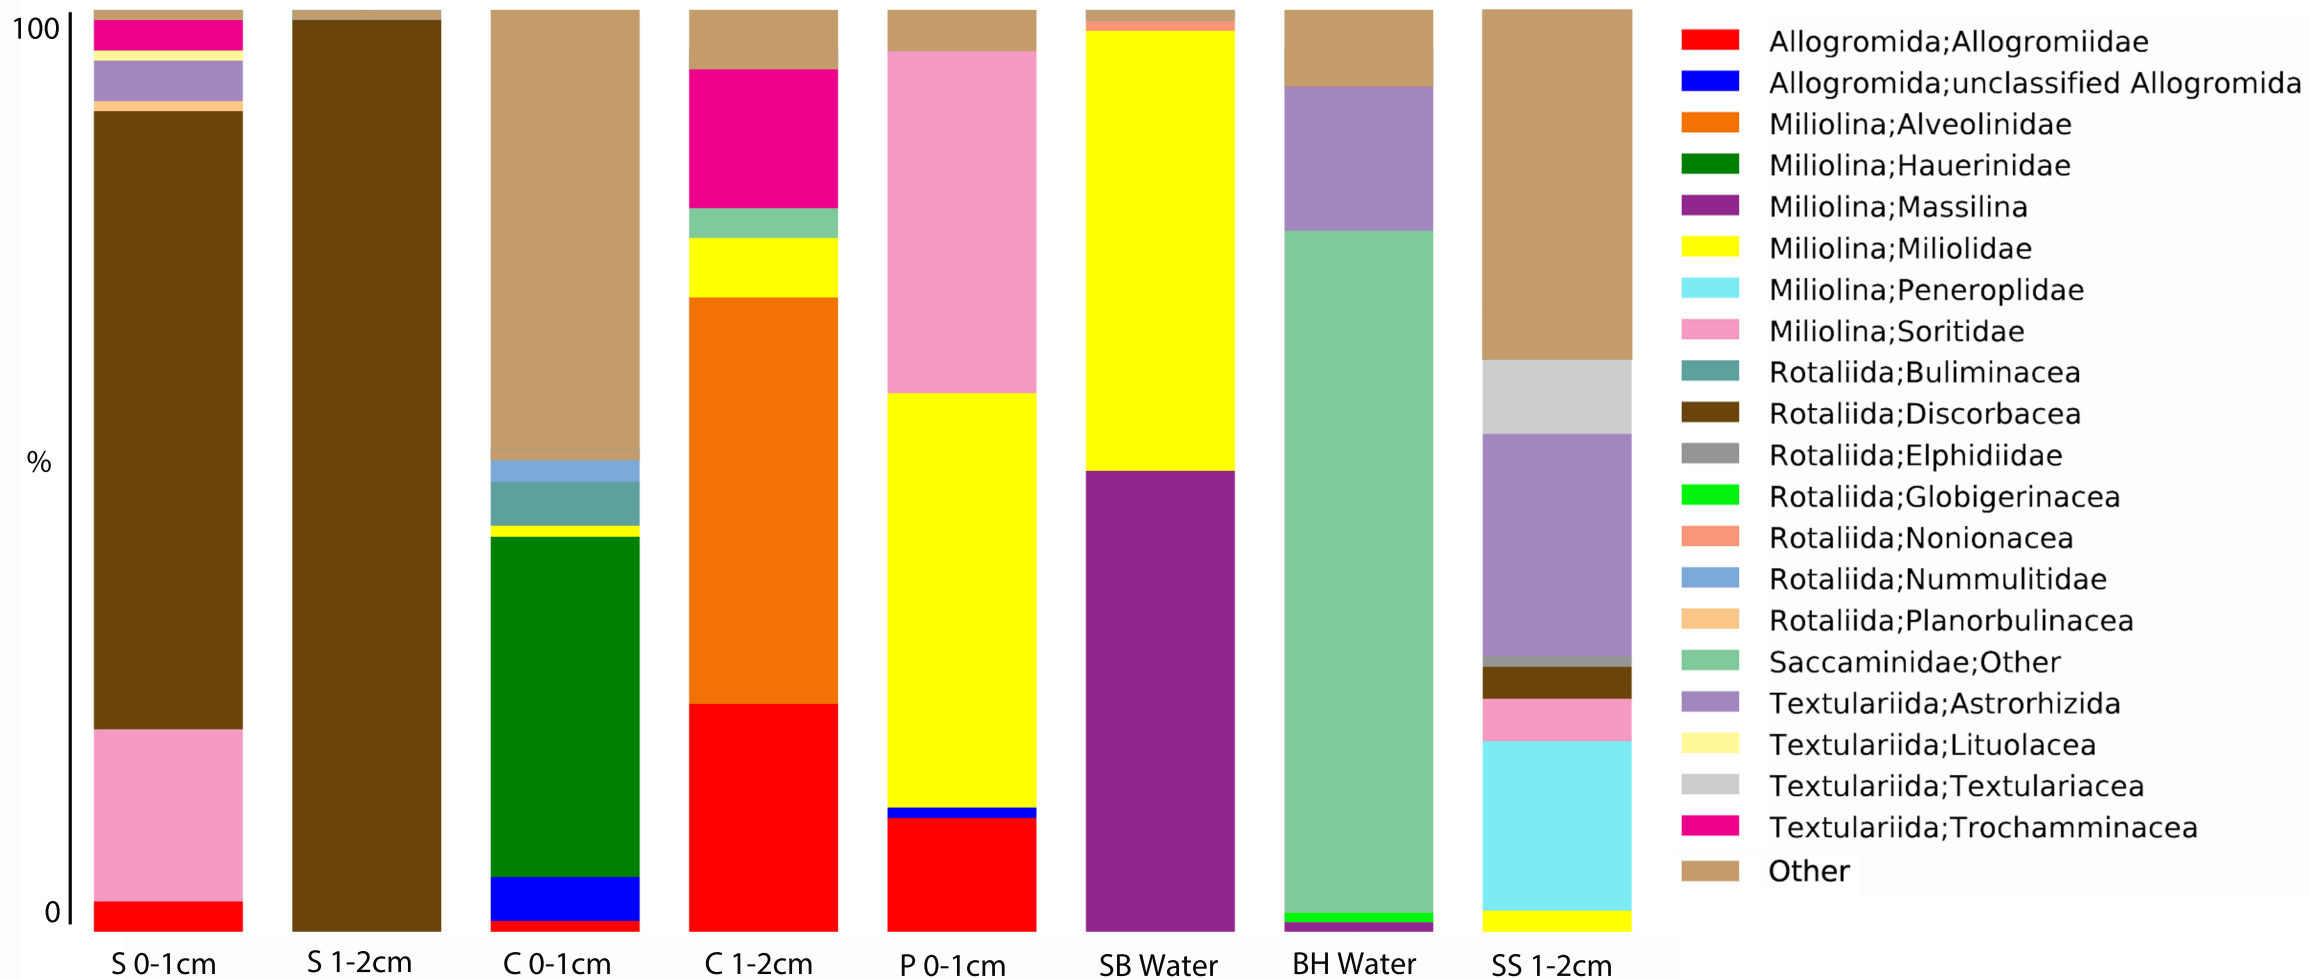

Supplement: ismej2013130x4.pdf [file ismej2013130x4.pdf]
